# Supplementary material
Source: PubMed Central journal article supplement (PMC3732474)

# Supplemental Figure 1

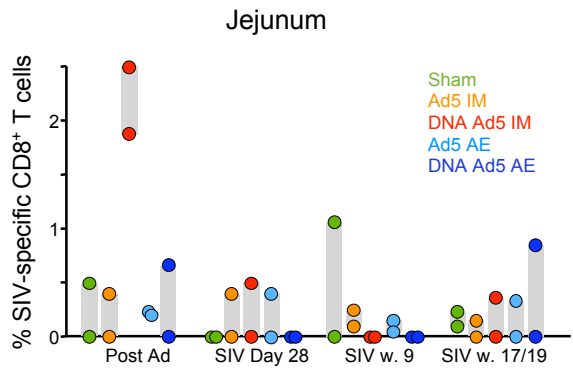

# Supplemental Figure 2

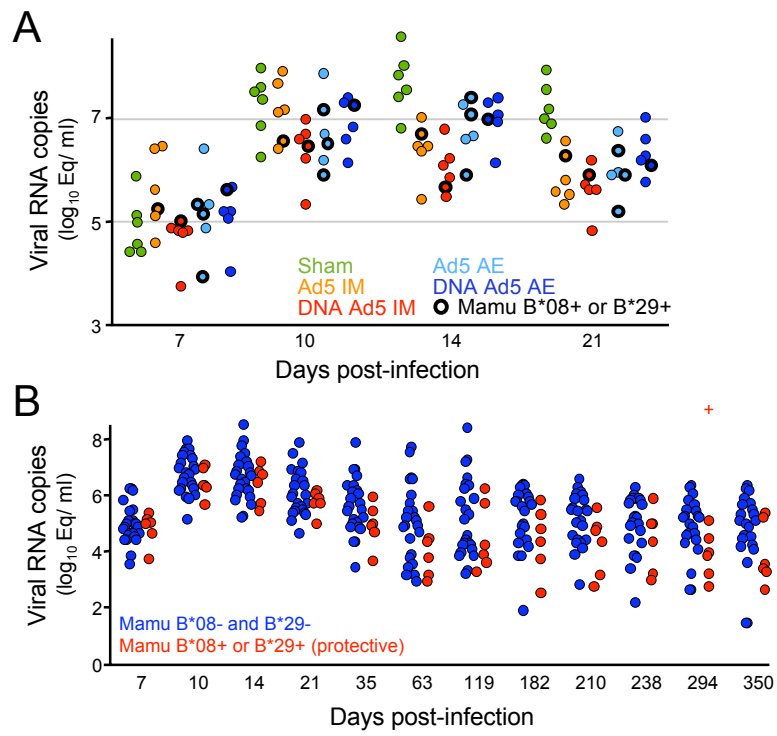

# Supplemental Figure 3

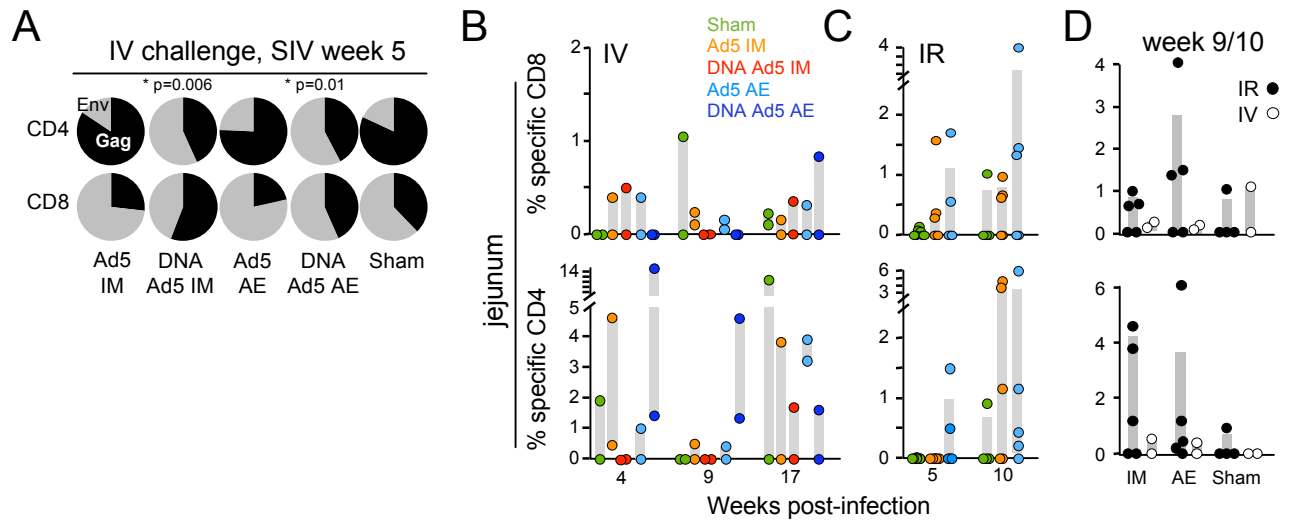

# Supplemental Figure 4

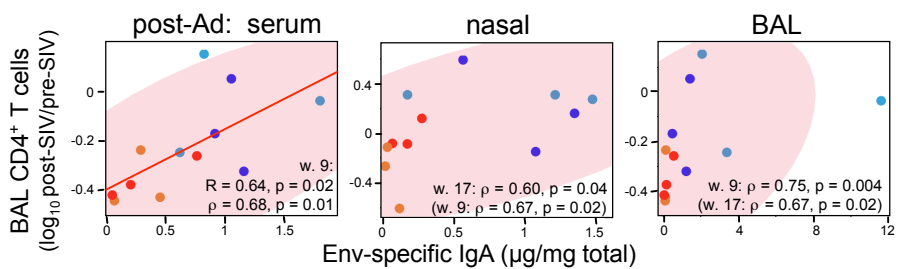

Supplement: NIHMS479363-supplement-Supplementary_Figures.pdf [file NIHMS479363-supplement-Supplementary_Figures.pdf]
